# Supplementary material for: Catalytic hydrotreatment of fast pyrolysis liquids in batch and continuous set-ups using a bimetallic Ni–Cu catalyst with a high metal content
Source: Royal Society of Chemistry journal article supplement (doi:10.1039/c6cy00503a), 2016-01-01
Supplement: c6cy00503a1.pdf [file c6cy00503a1.pdf]

## Supplementary Information for

### Catalytic hydrotreatment of fast pyrolysis liquids in batch and continuous set-ups using a bimetallic Ni-Cu catalyst with a high metal content

Wang Yin<sup>1</sup>, Arjan Kloekhorst<sup>1</sup>, Robertus H. Venderbosch<sup>2</sup>, Maria V. Bykova<sup>3</sup>, Sofia A. Khromova<sup>3</sup>, Vadim. A. Yakovlev<sup>3</sup>, Hero J. Heeres\*<sup>1</sup>

<sup>1</sup> Department of Chemical Engineering, University of Groningen, Nijenborgh 4, 9747 AG, Groningen, The Netherlands

<sup>2</sup> Biomass Technology Group BV, Josink Esweg 34, 7545 PN Enschede, The Netherlands

<sup>3</sup> Boreskov Institute of Catalysis, 5, pr. Akad. Lavrentieva, 630090 Novosibirsk, Russia

(\*) corresponding author: h.j.heeres@rug.nl Tel.: +31 50 3634174

#### Content:

Tables: 2

Figures: 5

Table S1 Summary of studies about catalytic hydrotreatment of pyrolysis liquids over nickel based catalysts

| Entry | Catalyst                                                 | Feed                                         | Reaction Temperature                           | H <sub>2</sub> Pressure | Reaction time, LHSV                      | Reactor type            | Product properties                                                                                                        | Reference      |
|-------|----------------------------------------------------------|----------------------------------------------|------------------------------------------------|-------------------------|------------------------------------------|-------------------------|---------------------------------------------------------------------------------------------------------------------------|----------------|
| 1     | Ru/C for stabilization<br>Sulfided Ni-Mo/C for HDO       | Pyrolysis oil from sawdust                   | 170-250 °C for stabilization<br>400 °C for HDO | 13.8 MPa                | 0.19 h <sup>-1</sup>                     | Two-stage fixed bed     | Product yield 0.35-0.45g/g dry feed,<br>oxygen content 0.2-0.3 wt.%                                                       | <sup>1</sup>   |
| 2     | Sulfided Ni-Mo/ $\gamma$ -Al <sub>2</sub> O <sub>3</sub> | Pyrolysis oil from oak                       | 150 °C for stabilization<br>340-400 °C for HDO | 6.9-16.9 MPa            | 1 h for stabilization and<br>1 h for HDO | Semibatch reactor       | 63-68 % carbon yield in organic phase,<br>around 5 wt.% oxygen content                                                    | <sup>2</sup>   |
| 3     | Sulfided Ni-Mo/ $\gamma$ -Al <sub>2</sub> O <sub>3</sub> | 10 wt.% pyrolysis oil in 1-methylnaphthalene | 280-350 °C                                     | 0.34-0.97 MPa           | 0.4-2 h <sup>-1</sup>                    | Fixed bed reactor       | TAN in products from 2.2 to 8.6 mg KOH/g, acid conversion from 63 to 91%,<br>O/C from 4.06 to 1.04, H/C from 1.17 to 1.26 | <sup>3</sup>   |
| 4     | Sulfided Ni-Mo/ $\gamma$ -Al <sub>2</sub> O <sub>3</sub> | Pyrolysis oil from sawdust                   | 270 °C                                         | 2.07 MPa                | 0.0011-0.0065 m/s                        | Packed bed microreactor | HDO up to 40%                                                                                                             | <sup>4</sup>   |
| 5     | Sulfided Ni-Mo/ $\gamma$ -Al <sub>2</sub> O <sub>3</sub> | Rapeseed pyrolysis oil                       | 260-350 °C                                     | 3 MPa                   | 2.0 h <sup>-1</sup>                      | Packed bed reactor      | Oxygen content from 8.12 to 2.82 wt.%                                                                                     | <sup>5,6</sup> |
| 6     | Reduced Ni-Mo/ $\gamma$ -Al <sub>2</sub> O <sub>3</sub>  | Pyrolysis oil from pine sawdust              | 200 °C                                         | 3 MPa                   | 2 h                                      | Batch autoclave         | pH increased from 2.16 to 2.84,<br>hydrogen content increased from 6.61 to 6.93 wt.%                                      | <sup>7</sup>   |
| 7     | Reduced Ni-Mo/CNT                                        | Pyrolysis oil from pine sawdust              | 100-250 °C                                     | 5-6 MPa                 | 2-10 h                                   | Batch autoclave         | pH from 2.92 to 3.68, hydrogen content from 8.40 to 11.26 wt.%                                                            | <sup>8</sup>   |

|    |                                                                                                      |                                                                     |                                            |                                                             |                                            |                   |                                                                                                                         |    |
|----|------------------------------------------------------------------------------------------------------|---------------------------------------------------------------------|--------------------------------------------|-------------------------------------------------------------|--------------------------------------------|-------------------|-------------------------------------------------------------------------------------------------------------------------|----|
| 8  | Raney Ni                                                                                             | Pyrolysis oil from liquid phase pyrolysis                           | 250 °C for stabilization<br>400 °C for HDO | 8.5 MPa for stabilization and<br>15.0-17.0 MPa for HDO      | 2-4 h for stabilization and<br>2 h for HDO | Batch autoclave   | Oxygen content 1.9 wt.%                                                                                                 | 9  |
| 9  | Raney Ni                                                                                             | Pyrolysis oil in methanol and formic acid                           | 200 °C                                     | Formic acid as hydrogen donor and the pressure around 8 MPa | 5-8 h                                      | Batch autoclave   | Water content 17.7 wt.%, viscosity 4.16 mm <sup>2</sup> /s, pH=4.35, heating value 22.06 MJ/kg, organic yield 86.7 wt.% | 10 |
| 10 | Ni/HZSM-5                                                                                            | Pyrolysis oil from sawdust                                          | 240 °C                                     | 4.0 MPa                                                     | 3 h                                        | Batch autoclave   | Oxygen content 38.66 wt.%                                                                                               | 11 |
| 11 | Ni/HZSM-5(Ni content 20 wt.%), Ni/SiO <sub>2</sub> -ZrO <sub>2</sub> (Ni content from 10 to 25 wt.%) | Pyrolysis oil in ethanol                                            | 280 °C                                     | 1.5 MPa                                                     | 5 h                                        | Batch autoclave   | acid, phenolics, esters, alcohols, ketones, aldehydes detected                                                          | 12 |
| 12 | Ni/TiO <sub>2</sub> -ZrO <sub>2</sub>                                                                | Pyrolysis oil in decalin                                            | 300 °C                                     | 4.0 MPa                                                     | 8 h                                        | Batch autoclave   | Upgraded oil: 19.3 wt.% oxygen content, pH=4.21, water content 1.5 wt.%, heating value 25.8 MJ/kg                       | 13 |
| 13 | Ni/ZrO <sub>2</sub>                                                                                  | Bio-oil from hydrothermal liquefaction of cornstalks in cyclohexane | 300 °C                                     | 5 MPa                                                       | 4 h                                        | Batch autoclave   | Oxygen content of product decreased from 26.79 to 0.75 wt.%                                                             | 14 |
| 14 | Ni-Co-Pd/γ-Al <sub>2</sub> O <sub>3</sub>                                                            | Pyrolysis oil from Chlorella                                        | 300 °C                                     | 2 MPa                                                       | 3 h <sup>-1</sup>                          | Fixed bed reactor | Oxygen content of product was 2.1 wt.%, deoxygenation degree 80.5%                                                      | 15 |

|    |                                                                                                                                                               |                                                                               |                                             |                                             |                                           |                                                               |                                                                                                           |    |
|----|---------------------------------------------------------------------------------------------------------------------------------------------------------------|-------------------------------------------------------------------------------|---------------------------------------------|---------------------------------------------|-------------------------------------------|---------------------------------------------------------------|-----------------------------------------------------------------------------------------------------------|----|
| 15 | Ni-Fe/ $\gamma$ -Al <sub>2</sub> O <sub>3</sub>                                                                                                               | Pyrolysis oil from straw                                                      | 400 °C                                      | Atmospheric pressure                        | 0.03 ml/min                               | Tubular quartz reactor                                        | pH=7.5, heating value 43.9 MJ/kg, H/C ratio 2.15                                                          | 16 |
| 16 | Ru/C for stabilization<br>Ni-Fe/ $\gamma$ -Al <sub>2</sub> O <sub>3</sub> for HDO                                                                             | Pyrolysis oil in organic solvents (tetraline, decalin, diesel or isopropanol) | 300 °C for stabilization and 400 °C for HDO | 10 MPa for stabilization and 13 MPa for HDO | 3 h for stabilization and 20 ml/h for HDO | Batch reactor for stabilization and fixed bed reactor for HDO | Deoxygenation degree from 92-94%                                                                          | 17 |
| 17 | Ni-Cu/ZrO <sub>2</sub> (Cu/Ni ratio from 0.14-1.00 w/w) with a fixed metal loading 22 wt.%                                                                    | Pyrolysis oil from alge (Chlorella and Nanochloropsis sp.)                    | 350 °C                                      | 2 MPa                                       | 3.5 h <sup>-1</sup>                       | Tricked bed reactor                                           | Oxygen content decreased from 7.19 to 1.30 wt.% and from 5.81 to 1.63 wt.%, highest HDO efficiency of 82% | 18 |
| 18 | Ni-Cu on CeO <sub>2</sub> -ZrO <sub>2</sub> , ZrO <sub>2</sub> , TiO <sub>2</sub> , Carbon from rice husk, Sibunite, $\delta$ -Al <sub>2</sub> O <sub>3</sub> | Pyrolysis oil from pine wood                                                  | 150 °C for stabilization and 350 °C for HDO | 11.0 MPa                                    | 1 h for stabilization and 3 h for HDO     | Batch autoclave                                               | Oxygen content of product Ranging from 5.4 to 17.7 wt.%                                                   | 19 |
| 19 | Ni-Cu/ $\delta$ -Al <sub>2</sub> O <sub>3</sub> (Ni content 20.8-5.92 wt.% and Cu content 0-18.2 wt.%)                                                        | Pyrolysis oil from pine wood                                                  | 150 °C for stabilization and 350 °C for HDO | 10.0 MPa                                    | 1 h for stabilization and 3 h for HDO     | Batch autoclave                                               | Oxygen content of products ranging from 12.2 to 17.1 wt.%                                                 | 20 |

Table S2 <sup>1</sup>H-NMR of pyrolysis liquids and upgraded oils after catalytic hydrotreatment using Ni-Cu catalyst in the batch set-up

| Chemical shift region (ppm) | Proton assignments                                              | PL (%-H) | 80 °C (%-H) | 180 °C (%-H) | 250 °C (%-H) | 300 °C (%-H) | 350 °C (%-H) |
|-----------------------------|-----------------------------------------------------------------|----------|-------------|--------------|--------------|--------------|--------------|
| 10.0-8.0                    | -CHO, -COOH, downfield ArH                                      | 1        | 1           | 0            | 0            | 0            | 0            |
| 8.0-6.8                     | ArH, HC=C (conjugated)                                          | 4        | 4           | 2            | 1            | 2            | 3            |
| 6.8-6.4                     | HC=C(nonconjugated)                                             | 3        | 4           | 4            | 4            | 5            | 4            |
| 6.4-4.2                     | -CH <sub>n</sub> -O-, ArOH, HC=C (nonconjugated)                | 18       | 24          | 13           | 4            | 2            | 2            |
| 4.2-3.0                     | CH <sub>3</sub> O-, -CH <sub>2</sub> O-, -CHO-                  | 28       | 23          | 27           | 29           | 16           | 7            |
| 3.0-2.2                     | CH <sub>3</sub> (=O)-, CH <sub>3</sub> -Ar, -CH <sub>2</sub> Ar | 12       | 14          | 12           | 11           | 16           | 17           |
| 2.2-1.6                     | -CH <sub>2</sub> -, aliphatic OH                                | 22       | 20          | 17           | 17           | 21           | 20           |
| 1.6-0.0                     | -CH <sub>3</sub> , -CH <sub>2</sub> -                           | 12       | 10          | 25           | 34           | 38           | 47           |

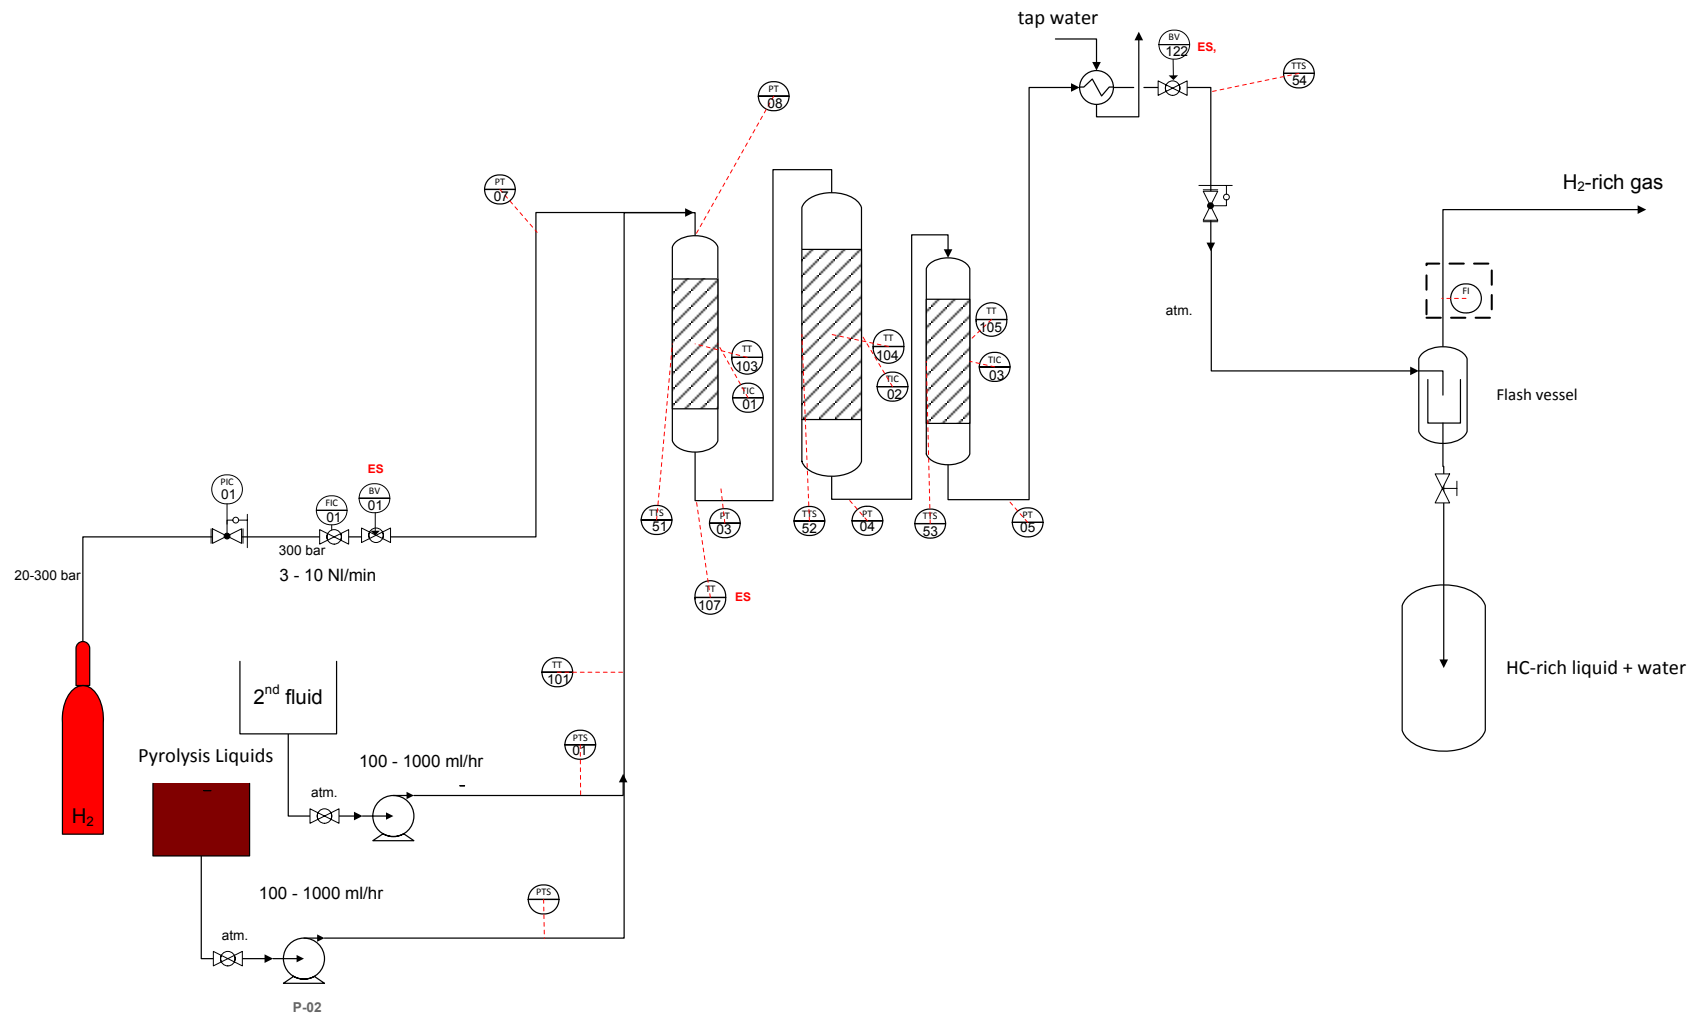

Figure S1. Schematic overview of the continuous hydrotreatment set-up

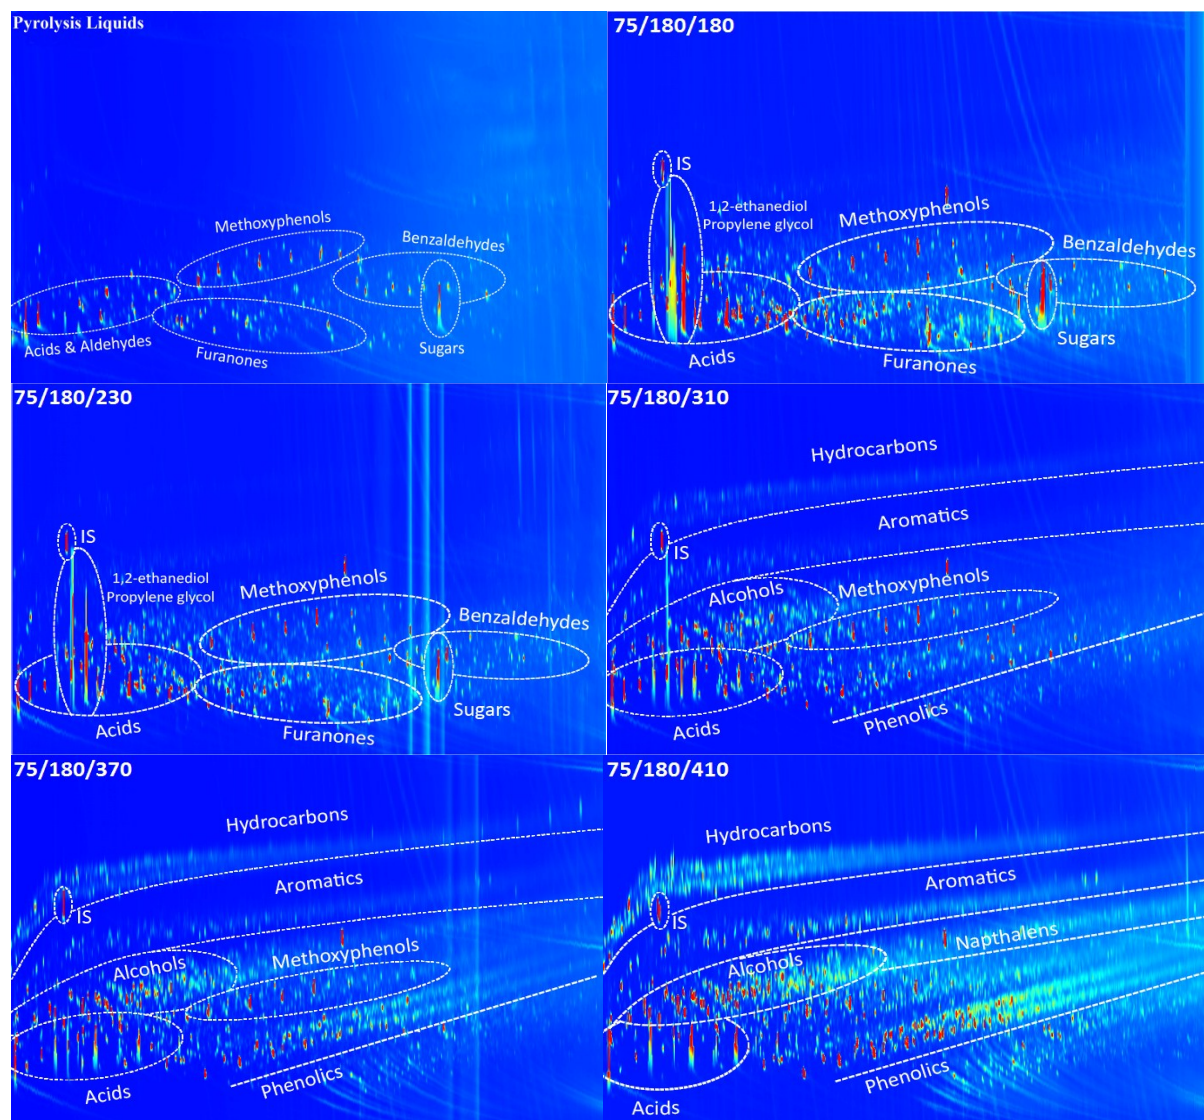

Figure S2 GC x GC spectrum of pyrolysis liquids and upgraded oils obtained in the continuous set-up using Ni-Cu catalyst (IS: internal standard, di-n-butyl ether)

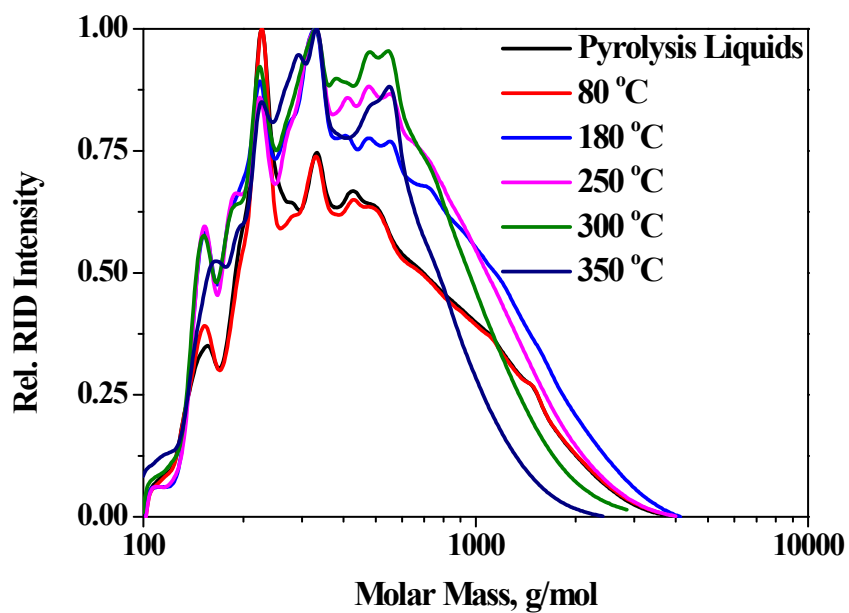

Figure S3 Molecular weight distribution by GPC analysis for pyrolysis liquids and upgraded oils in the batch set-up



### Flash points of the organic phases

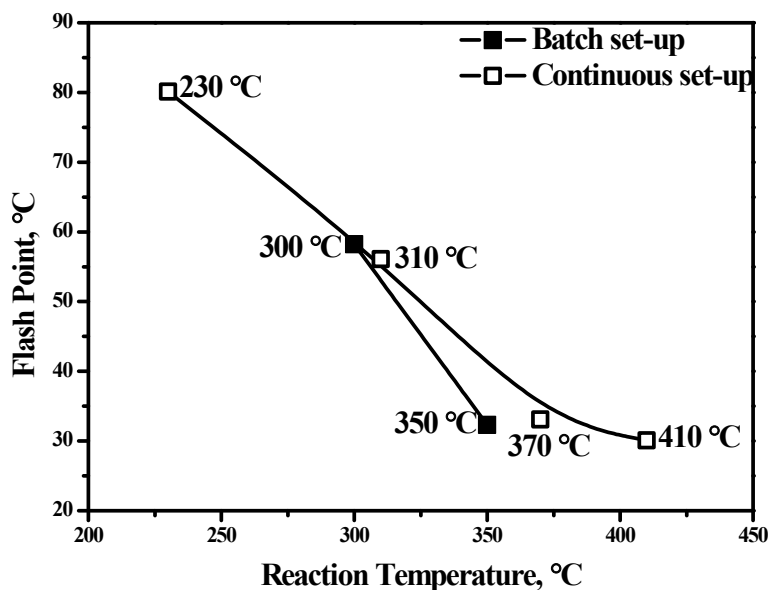

Figure S4 Flash point of the product oils obtained using Ni-Cu catalyst in the batch reactor and continuous set-up

The flash points for the product oils from the batch and continuous set-up were determined and the results are given in Figure S4. Clear flash points were not detected for the pyrolysis liquids feed and the product oils obtained at 180 °C from continuous set-up and for the product oils at 80-250 °C from batch reactor, presumably due to the large amount of water in these samples (22.6-15.9 wt.% for continuous reactor and 32.1-9.7 wt.% for the batch reactor). For the other products, a clear trend is visible; the flash point reduces dramatically when increasing the hydrotreatment temperature, especially for the product oils from continuous reactor. This indicates the presence of larger amounts of volatile compounds with a lower molecular weight by deoxygenation and hydrocracking reactions when increasing the hydrotreatment temperature. Compared to the products from continuous set-up, the product oils from batch set-up have a slightly lower flash point, presumably due to the higher H/C ratio of the product oils as shown in Figure 2.

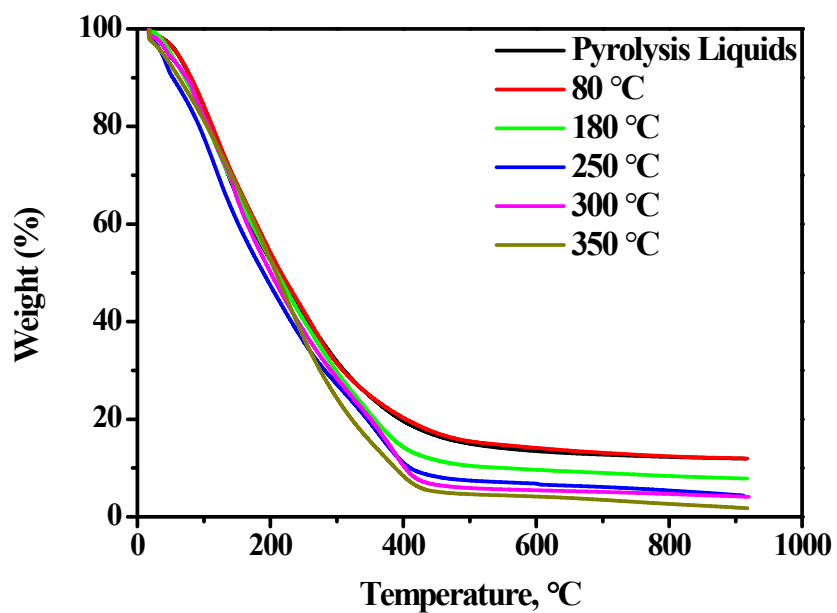

Figure S5 TG residue of pyrolysis liquids and product oils using Ni-Cu catalyst in the batch set-up

## References for supplementary material

- 1 D. C. Elliott, T. R. Hart, G. G. Neuenschwander, L. J. Rotness, M. V. Olarte, A. H. Zacher and Y. Solantausta, *Energy Fuels*, 2012, **26**, 3891-3896.
- 2 R. J. French, J. Stunkel, S. Black, M. Myers, M. M. Yung and K. Iisa, *Energy Fuels*, 2014, **28**, 3086-3095.
- 3 Y. Wang, H. Lin and Y. Zheng, *Catalysis Science & Technology*, 2014, **4**, 109-119.
- 4 N. Joshi and A. Lawal, *Chemical Engineering Science*, 2012, **74**, 1-8.
- 5 K. Pstrowska, J. Walendziewski, R. Łużny and M. Stolarski, *Catalysis Today*, 2014, **223**, 54-65.
- 6 K. Pstrowska, J. Walendziewski and M. Stolarski, *Fuel Process Technol*, 2014, **128**, 191-198.
- 7 Y. Xu, T. Wang, L. Ma, Q. Zhang and L. Wang, *Biomass Bioenergy*, 2009, **33**, 1030-1036.
- 8 M. Zhou, L. Tian, L. Niu, C. Li, G. Xiao and R. Xiao, *Fuel Process Technol*, 2014, **126**, 12-18.
- 9 H. Pucher, N. Schwaiger, R. Feiner, L. Ellmaier, P. Pucher, B. S. Chernev and M. Siebenhofer, *Green Chem.*, 2015, **17**, 1291-1298.
- 10 W. Xiong, Y. Fu, F. Zeng and Q. Guo, *Fuel Process Technol*, 2011, **92**, 1599-1605.
- 11 X. Zhang, T. Wang, L. Ma, Q. Zhang and T. Jiang, *Bioresour. Technol.*, 2013, **127**, 306-311.
- 12 X. Zhang, L. Chen, W. Kong, T. Wang, Q. Zhang, J. Long, Y. Xu and L. Ma, *Energy*, 2015, **84**, 83-90.
- 13 X. Zhang, J. Long, W. Kong, Q. Zhang, L. Chen, T. Wang, L. Ma and Y. Li, *Energy Fuels*, 2014, **28**, 2562-2570.
- 14 W. Shi, Y. Gao, S. Song and Y. Zhao, *Ind Eng Chem Res*, 2014, **53**, 11557-11565.
- 15 W. ZHONG, Q. GUO, X. WANG and L. ZHANG, *Journal of Fuel Chemistry and Technology*, 2013, **41**, 571-578.
- 16 S. Leng, X. Wang, X. He, L. Liu, Y. Liu, X. Zhong, G. Zhuang and J. Wang, *Catalysis Communications*, 2013, **41**, 34-37.
- 17 X. Xu, C. Zhang, Y. Liu, Y. Zhai and R. Zhang, *Chemosphere*, 2013, **93**, 652-660.
- 18 Q. Guo, M. Wu, K. Wang, L. Zhang and X. Xu, *Ind Eng Chem Res*, 2015, **54**, 890-899.
- 19 A. R. Ardiyanti, S. Khromova, R.H. Venderbosch, V. Yakovlev, I. Melián-Cabrera and H.J. Heeres, *Applied Catalysis A: General*, 2012, **449**, 121-130.

20 A. R. Ardiyanti, S. Khromova, R. H. Venderbosch, V. Yakovlev and H. J. Heeres, *Applied Catalysis B: Environmental*, 2012, **117**, 105-117.
